# Supplementary material for: The contribution of transport emissions to ozone mixing ratios and methane lifetime in 2015 and 2050 in the Shared Socioeconomic Pathways (SSPs)
Source: Copernicus journal article supplement (doi:10.5194/egusphere-2024-324), 2024-02-12
Supplement: Supplementary file 2 [file egusphere-2024-324-supplement.zip]

Archive with 2 entries (2 files):
- Supplement.pdf
- meccanism.pdf
